# Supplementary material for: Transposable elements contribute to the genomic response to insecticides in Drosophila melanogaster
Source: Philos Trans R Soc Lond B Biol Sci. 2020 Feb 10;375(1795):20190341. doi: 10.1098/rstb.2019.0341 (PMC7061994; doi:10.1098/rstb.2019.0341)
Supplement: Table S5. ATAC-seq analysis [file rstb20190341supp6.xlsx]

## Sheet: A) ReadStats
Table S5. ATAC-seq analysis
A. Statistics of the sequencing results
Sample Name	Raw pair-end sequences	% GC	% trimmed	# of aligned reads	% aligned reads
SE-StoC1	29413743	39	1.67	8842806	15.03
SE-StoC2	34079292	39	1.4	9855330	14.46
SE-StoC3	32332035	39	1.2	8941044	13.83
SE-StoT1	32387937	38	1.53	7904746	12.2
SE-StoT3	46277487	38	1.2	12056412	13.03
SE-StoT4	27502576	38	1.37	6750708	12.27
R177C1	51909666	41	2.2	25206046	24.28
R177C3	31213468	41	2.72	14529966	23.28
R177C4	32387214	43	2.88	15765130	24.34
R177T2	34227371	43	3.43	17250740	25.2
R177T3	32449214	43	3.43	15006774	23.12
R177T4	35174835	42	2.92	16675260	23.7
R375C1	39591395	42	2.17	21398654	27.02
R375C2	33786399	42	1.61	17729712	26.24
R375C3	44613362	43	1.7	24469046	27.42
R375T2	29978742	42	1.75	16601188	27.69
R375T3	27421116	41	1.5	13143302	23.97
R375T4	28433182	42	1.93	12572560	22.11
REFC1	36702135	43	1.81	18962178	25.83
REFC2	30683773	43	1.75	17512328	28.54
REFC4	50088717	43	1.59	26710502	26.66
REFT1	30932397	43	1.62	16689190	26.98
REFT2	31477393	43	1.55	16175874	25.69
REFT3	25031515	42	1.73	12739624	25.45

## Sheet: B) ATAC-seq summary
Table S5B. Summary of the statistics of the ATAC-seq peaks and their localization. The last column (All strains) includes the statistics for all strains together.
	SE-Sto	RAL-375	RAL-177	iso-1	All strains
Total # of peaks	23772	23990	23453	23033	27390
# of peaks in genes + 1 kb upstream	22,085 (93%)	22,326 (93.1%)	21,858 (93.2%)	21,468 (93.2%)	25,257 (92.2%)
# of peaks only in nonstress conditions	2,375/ 20,805 (11.4%)	3,016/ 22,256 (13.6%)	2,240/ 22,385 (10%)	1,501/ 21,056 (7.1%)	7,495/ 26,750 (28%)
# of peaks only in stress conditions	2,967/ 21,397 (13.9%)	1,734/ 20,974 (8.3%)	1,068/ 21,213 (5%)	1,977/ 21,532 (9.2%)	6,576/ 26,798 (24.5%)
# of DEGs with peaks	100/ 153 (65.4%)	458/ 694 (66%)	1,970/ 2,659 (74.1%)	1,988/ 2,778 (71.6%)	3,890/ 4,655 (83.6%)
# of up-regulated genes with peaks and cnc motifs	2/ 31 (6.5%)	41/ 216 (19%)	112/ 914 (12.3%)	120/ 895 (13.4%)	234/ 1,738 (13.5%)
# of TEs with peaks	75	74	77	171	199
# of TEs with peaks only in nonstress conditions	8/ 62 (12.9%)	14/ 65 (21.5%)	16/ 73 (21.9%)	10/ 149 (6.7%)	38/ 180 (21.1%)
# of TEs with peaks only in nonstress conditions nearby genes	5	9	12	6	26
# of TEs with peaks only in nonstress conditions nearby DEGs	0	0	5	1	6
# of TEs with peaks only in nonstress conditions away from genes	3	5	4	4	12
# of TEs with peaks only in stress conditions	13/ 67 (19.4%)	9/ 60 (15%)	4/ 61 (6.6%)	22/ 161 (13.7%)	45/ 191 (23.6%)
# of TEs with peaks only in stress conditions nearby genes	10	5	1	5	20
# of TEs with peaks only in stress conditions nearby DEGs	0	0	1	2	3
# of TEs with peaks only in stress conditions away from genes	3	4	3	17	25
# of TEs with peaks nearby genes	52/ 75 (69.3%)	48/ 74 (64.9%)	56/ 77 (72.7%)	77/ 171 (45%)	95/ 199 (47.7%)
# of TEs with peaks nearby DEGs	0	5/ 48 (10.4%)	17/ 56 (30.4%)	17/ 77 (22.1%)	30/ 95 (31.6%)
# of TEs with peaks and cnc motif nearby up-regulated genes	0	0	1	1	2
# of TEs with peaks distal to genes	23	26	21	94	104
# of TEs with peaks and cnc motif and distal to genes	0	1	0	9	9

## Sheet: C) DEGs with peaks
Table S5C. Summary of ATAC-seq peaks amoing differntially expressed genes
	SE-Sto	RAL-375	RAL-177	iso-1
Up-regulated genes with peaks	34/78 (43.6%)	225/352 (63.9%)	934/1195 (78.2%)	915/1180 (77.5%)
Up-regulated genes with peaks only in treated conditions	9/34 (26.5%)	33/225 (14.7%)	89/934 (9.5%)	153/915 (16.7%)
Down-regulated genes with peaks	66/75 (88%)	233/342 (68.1%)	1036/1464 (70.1%)	1073/1598 (67.1%)
Down-regulated genes with peaks only in control conditions	17/66 (25.8%)	63/233 (27%)	236/1036 (22.8%)	166/1073 (15.5%)

## Sheet: D) 199 TEs with peaks
Table S5D. Additional information of the 199 TEs with ATAC-seq peaks
1) TEs near genes with peaks. The TE's name, family and class are specified as well as the gene (or genes) with peaks in proximity. The number of cnc binding sites in the peak is also specified. Finally the last four columns specify whether the peak is found in stress, nonstress, both or none of the conditions on each stain.
2) Tables of counts for Fisher's Exact Test for the 199 TEs with peaks. Only families with more than 25 elements were considered. Families with a p-value<0.005 were considered significant and are indicated with ***.
3) Tables of counts for Fisher's Exact Test for the 104 TEs away from genes. Only families with more than 25 elements were considered. Families with a p-value<0.005 were considered significant and are indicated with ***.
1)										2)										3)
TE Flybase ID	TE family	TE class	Gene with peak in proximity	Number of Cnc binding sites	Peak in SE-Sto	Peak in RAL-375	Peak in RAL-177	Peak in iso-1		TE family	Counts in all 5416 TEs	Counts in 199 TEs with peaks	p-value		TE class	Counts in all 5416 TEs	Counts in 199 TEs with peaks	p-value		TE family	Counts in all 5416 TEs	Counts in 104 TEs with peaks	p-value		TE class	Counts in all 5416 TEs	Counts in 104 TEs with peaks	p-value
FBti0063689	mdg1	LTR	FBgn0264922	0	Both	Both	Both	Both		1360 ***	303	19	0.004		DNA	3044	71	1		1360	303	6	0.247		DNA	3044	22	1
FBti0064264	INE-1	DNA	FBgn0027052	0	Both	Both	Both	Both		297	80	1	0.771		LINE ***	1054	69	0		297	80	1	0.392		LINE ***	1054	45	0
FBti0019149	G2	LINE		0	Both	Stress	Both	Both		412	37	0	0.729		LTR	1318	59	0.033		412	37	0	0.468		LTR ***	1318	37	0.003
FBti0061396	micropia	LTR	FBgn0263746, FBgn0051812	0	Both	Both	Both	Both		baggins	34	1	0.33							baggins	34	0	0.44
FBti0019197	Tc1	DNA	FBgn0032665	0	Stress	Nonstress	Both	Both		blood	25	0	0.586							blood	25	0	0.347
FBti0019782	G-element	LINE	FBgn0032851	1	Nonstress	Stress	Both	Both		BS	43	2	0.185							BS	43	1	0.163
FBti0062174	1360	DNA		0	None	Both	Stress	None		BS3	29	3	0.017							BS3	29	1	0.085
FBti0059673	H	DNA		0	Nonstress	Both	None	None		copia	35	0	0.709							copia	35	0	0.449
FBti0060252	H	DNA		1	None	None	None	Stress		Cr1a	152	9	0.036							Cr1a	152	3	0.253
FBti0059701	G2	LINE		1	None	None	None	Stress		diver2	47	3	0.078							diver2	47	1	0.187
FBti0019819	hopper2	DNA		0	None	None	None	Stress		Dm88	31	1	0.291							Dm88	31	1	0.095
FBti0062779	1360	DNA	FBgn0011638, FBgn0015803	0	Both	Both	Both	Both		Doc	68	1	0.688							Doc	68	0	0.688
FBti0063349	Rt1c	LINE		0	None	None	None	Both		FB	60	3	0.152							FB	60	0	0.641
FBti0063391	INE-1	DNA	FBgn0266369, FBgn0053318	0	None	None	None	Both		F-element	70	2	0.438							F-element	70	1	0.331
FBti0019220	Tirant	LTR	FBgn0250867	0	None	None	None	Both		flea	29	1	0.265							flea	29	1	0.085
FBti0019221	baggins	LINE	FBgn0032938	0	None	None	None	Nonstress		G4	28	1	0.252							G4	28	1	0.08
FBti0019225	mariner2	DNA		1	None	None	None	Stress		G5	25	3	0.01							G5	25	2	0.008
FBti0062236	BS3	LINE		1	None	None	None	Stress		G5A	27	2	0.065							G5A	27	0	0.369
FBti0062092	X-element	LINE		0	None	None	None	Stress		gypsy12	50	2	0.248							gypsy12	50	2	0.051
FBti0060299	INE-1	DNA	FBgn0041245, FBgn0032945	0	None	Both	Both	Both		gypsy8 ***	56	6	0.003							gypsy8 ***	56	5	0
FBti0019830	G5	LINE		0	Both	Both	Both	Both		H ***	59	7	0.001							H ***	59	6	0
FBti0060298	F-element	LINE		0	None	None	None	Stress		HB	60	0	0.88							HB	60	0	0.641
FBti0019831	1360	DNA		0	None	None	None	Stress		HeT-A ***	26	9	0							HeT-A ***	26	7	0
FBti0019833	Idefix	LTR		0	None	None	None	Nonstress		I-element	38	2	0.142							I-element	38	2	0.025
FBti0062820	pogo	DNA	FBgn0053867, FBgn0053866	0	None	None	None	Nonstress		INE-1	2234	33	1							INE-1	2234	8	1
FBti0062256	INE-1	DNA	FBgn0032949	0	Stress	Nonstress	Both	Nonstress		invader1	45	2	0.202							invader1	45	1	0.175
FBti0062949	Circe	LTR		0	None	None	None	Stress		invader3	33	1	0.317							invader3	33	1	0.106
FBti0019230	Rt1b	LINE		0	None	None	None	Stress		invader4	32	0	0.677							invader4	32	0	0.42
FBti0062912	invader1	LTR	FBgn0262620	0	None	None	Nonstress	Both		jockey	96	4	0.237							jockey	96	3	0.077
FBti0060073	G5	LINE		0	Stress	Both	None	Stress		jockey2	28	0	0.628							jockey2	28	0	0.379
FBti0019244	Ivk	LINE		0	None	None	None	Both		mdg1	40	4	0.011							mdg1	40	1	0.145
FBti0064187	INE-1	DNA	FBgn0261802	0	Both	Both	None	Both		opus	31	2	0.09							opus	31	1	0.095
FBti0060028	1360	DNA	FBgn0032979, FBgn0266044	0	None	Stress	Stress	Both		pogo	48	1	0.499							pogo	48	0	0.559
FBti0064217	gypsy	LTR		0	Nonstress	Both	None	Nonstress		Quasimodo	29	0	0.641							Quasimodo	29	0	0.39
FBti0060155	gypsy8	LTR	FBgn0032981	0	Both	Both	Nonstress	Both		R1A1-element ***	26	5	0							R1A1-element ***	26	5	0
FBti0060358	Cr1a	LINE	FBgn0259683	0	None	None	None	Both		roo	136	6	0.189							roo	136	4	0.078
FBti0060056	Cr1a	LINE	FBgn0259683	0	None	None	None	Both		Rt1a	25	2	0.053							Rt1a	25	1	0.065
FBti0019252	G3	LINE		0	None	None	None	Stress		Rt1b ***	58	8	0							Rt1b ***	58	6	0
FBti0059695	Rt1c	LINE		0	None	None	None	Stress		Rt1c	33	2	0.104							Rt1c	33	2	0.017
FBti0060415	gypsy8	LTR		0	Both	Both	Both	Both		S-element	65	2	0.391							S-element	65	0	0.671
FBti0059711	Rt1b	LINE		1	None	None	None	Stress		Stalker4	37	0	0.729							Stalker4	37	0	0.468
FBti0061935	gypsy8	LTR		0	Both	Both	Both	None		Tc1	26	1	0.226							Tc1	26	0	0.358
FBti0061286	INE-1	DNA		0	Both	Both	Both	None		Tirant	25	1	0.213							Tirant	25	0	0.347
FBti0060828	Rt1a	LINE		0	None	None	None	Both		X-element	55	4	0.04							X-element	55	2	0.065
FBti0060830	Rt1b	LINE		0	None	None	None	Both
FBti0063070	Cr1a	LINE	FBgn0026401	0	None	None	None	Both
FBti0063119	transib2	DNA	FBgn0026401	0	None	None	None	Both
FBti0063060	1360	DNA	FBgn0039994	0	None	None	Nonstress	None
FBti0063252	gypsy2	LTR		0	None	None	None	Both
FBti0063255	gypsy2	LTR		0	None	None	Stress	None
FBti0063265	gypsy10	LTR	FBgn0261387	0	Both	Both	Nonstress	None
FBti0063242	rooA	LTR		0	None	None	None	Both
FBti0019883	R1A1-element	LINE		0	None	None	None	Both
FBti0060892	INE-1	DNA	FBgn0040849	0	Both	Both	None	None
FBti0061107	diver2	LTR	FBgn0033005	0	None	None	Nonstress	None
FBti0060568	opus	LTR		0	None	None	None	Stress
FBti0060093	jockey	LINE		0	Stress	Nonstress	Stress	Both
FBti0060599	BS3	LINE	FBgn0033010	0	None	None	None	Both
FBti0018950	X-element	LINE	FBgn0033010	0	None	None	None	Nonstress
FBti0061404	INE-1	DNA		0	None	Both	None	None
FBti0061658	Rt1b	LINE		0	None	None	None	Both
FBti0059733	GATE	LTR		0	None	None	None	Both
FBti0061630	F-element	LINE	FBgn0259247	0	Both	None	None	None
FBti0061437	Cr1a	LINE		0	None	None	None	Both
FBti0061436	Cr1a	LINE		0	None	None	None	Both
FBti0019939	1360	DNA		0	Stress	Both	Both	None
FBti0059727	Rt1b	LINE		1	None	None	None	Both
FBti0018898	Cr1a	LINE		0	None	None	None	Both
FBti0059728	I-element	LINE		0	None	None	None	Both
FBti0060274	gypsy12	LTR		0	None	None	None	Both
FBti0059729	roo	LTR		0	None	None	None	Both
FBti0019957	BS	LINE		0	None	None	None	Both
FBti0059868	1360	DNA		0	Both	Both	Nonstress	Both
FBti0060263	Dm88	LTR		0	None	None	None	Both
FBti0060361	invader1	LTR		0	None	None	None	Both
FBti0060326	Tabor	LTR		0	None	None	None	Both
FBti0019969	1360	DNA		0	None	None	None	Both
FBti0060325	G4	LINE		0	None	None	None	Both
FBti0061163	HMS-Beagle	LTR	FBgn0050497, FBgn0266526	0	Both	Both	Both	Both
FBti0059731	roo	LTR		0	None	None	None	Both
FBti0059732	H	DNA		0	None	None	None	Both
FBti0062309	1360	DNA	FBgn0050015, FBgn0050016 FBgn0263510	0	Both	None	Both	Both
FBti0019020	roo	LTR	FBgn0033744	0	None	None	None	Both
FBti0062562	INE-1	DNA	FBgn0034105, FBgn0034106	0	None	None	Both	Both
FBti0019996	roo	LTR	FBgn0259211	0	Both	Both	Both	Both
FBti0019044	opus	LTR	FBgn0050389	0	None	None	Both	None
FBti0060760	H	DNA		0	Both	Both	Both	Both
FBti0018962	flea	LTR		0	None	None	Both	Both
FBti0059726	roo	LTR		0	None	None	None	Both
FBti0061523	INE-1	DNA	FBgn0050428, FBgn0035094	0	Both	None	None	None
FBti0061950	INE-1	DNA		0	Nonstress	Nonstress	None	None
FBti0059773	FB	DNA	FBgn0011817	0	None	None	None	Both
FBti0020066	NOF	DNA	FBgn0011817	0	None	None	None	Both
FBti0020068	Rt1a	LINE	FBgn0263219, FBgn0035861	0	None	None	None	Both
FBti0060235	HeT-A	LINE	FBgn0260859, FBgn0035993 FBgn0053926	0	Nonstress	Both	Both	Both
FBti0020117	gypsy5	LTR		0	None	None	None	Both
FBti0063333	Rt1b	LINE	FBgn0266982	0	Both	Both	Both	Both
FBti0020178	springer	LTR		0	None	None	None	Both
FBti0059736	FB	DNA	FBgn0259243	0	None	None	None	Both
FBti0020181	NOF	DNA	FBgn0259243	0	None	None	None	Both
FBti0020192	Cr1a	LINE	FBgn0037085	0	Both	Both	Both	Both
FBti0060213	INE-1	DNA	FBgn0037144	0	Both	Both	Both	Both
FBti0060231	INE-1	DNA	FBgn0027532, FBgn0264727	0	Both	Both	Both	Both
FBti0059665	FB	DNA	FBgn0052451	0	None	None	None	Both
FBti0062445	diver2	LTR		0	Both	Nonstress	Nonstress	Stress
FBti0062498	gypsy8	LTR		0	Both	Both	Nonstress	Both
FBti0020235	R1A1-element	LINE		0	Both	Both	Both	Both
FBti0062516	gypsy8	LTR		0	Both	Stress	None	Both
FBti0062187	1360	DNA	FBgn0266347	1	Stress	None	Nonstress	None
FBti0063239	G5	LINE	FBgn0266347	0	Both	Both	Both	Both
FBti0062132	INE-1	DNA	FBgn0263573, FBgn0052230	0	Nonstress	None	Both	None
FBti0020271	1360	DNA	FBgn0052230	0	Stress	Nonstress	None	None
FBti0020269	aurora	LTR		0	None	None	None	Stress
FBti0062666	HMS-Beagle	LTR		0	None	None	None	Both
FBti0062667	gypsy10	LTR		0	None	None	None	Both
FBti0059885	GATE	LTR		0	None	None	None	Both
FBti0062695	G2	LINE		0	Both	Both	None	Both
FBti0062387	Cr1a	LINE	FBgn0085386	0	Stress	Nonstress	Both	None
FBti0062578	BS	LINE	FBgn0263346	0	None	None	Both	Both
FBti0062558	gypsy	LTR		0	None	None	None	Both
FBti0062757	gtwin	LTR		0	None	None	None	Both
FBti0063301	diver2	LTR	FBgn0027951	0	Both	Nonstress	Both	Both
FBti0063788	INE-1	DNA	FBgn0266232	0	Stress	Both	Nonstress	Nonstress
FBti0059796	H	DNA		0	None	None	None	Both
FBti0020320	invader3	LTR		0	None	None	None	Both
FBti0019334	Transpac	LTR	FBgn0037548	0	None	None	None	Stress
FBti0060337	1360	DNA	FBgn0037560	0	Both	Nonstress	Both	Both
FBti0060443	1360	DNA	FBgn0051352	0	None	Both	Both	Both
FBti0019355	Rt1b	LINE		0	Both	None	Both	Both
FBti0060913	INE-1	DNA	FBgn0037884, FBgn0037885 FBgn0051441	0	Both	None	Both	Nonstress
FBti0062101	INE-1	DNA	FBgn0086686	0	Both	Both	Both	Both
FBti0063778	INE-1	DNA	FBgn0051217	0	Both	None	Both	Both
FBti0062914	HMS-Beagle	LTR	FBgn0011481	0	Stress	Both	Both	Both
FBti0063783	1360	DNA	FBgn0038723, FBgn0051220	0	Both	Both	Both	Both
FBti0063829	jockey	LINE		0	Both	None	Both	Both
FBti0064294	INE-1	DNA	FBgn0026056	0	Both	Both	Both	Both
FBti0059875	1360	DNA	FBgn0039015	0	Nonstress	Both	Nonstress	Both
FBti0060346	INE-1	DNA	FBgn0039177	0	Both	Stress	Both	Both
FBti0019430	Doc	LINE	FBgn0045761	0	Both	None	Both	Both
FBti0019444	Transpac	LTR	FBgn0085382	0	None	Both	Both	None
FBti0061018	jockey	LINE	FBgn0026400, FBgn0001215	1	Both	Both	Both	Both
FBti0062808	1360	DNA		0	Both	Nonstress	Both	Nonstress
FBti0062704	INE-1	DNA	FBgn0011747	0	Both	Both	Both	Stress
FBti0019476	I-element	LINE		0	None	None	None	Both
FBti0062880	gypsy8	LTR		0	None	None	None	Both
FBti0019480	S-element	DNA	FBgn0051999	0	Stress	Nonstress	None	None
FBti0020419	1360	DNA	FBgn0039904	0	Both	Both	Both	Both
FBti0020421	jockey	LINE		0	None	None	None	Both
FBti0063448	INE-1	DNA		0	Both	Both	Both	Both
FBti0019493	R1A1-element	LINE		0	None	None	None	Both
FBti0020438	1360	DNA	FBgn0266728, FBgn0264822	0	Both	Both	Nonstress	Stress
FBti0061370	INE-1	DNA		0	None	Nonstress	Both	None
FBti0061406	INE-1	DNA	FBgn0019650	0	Both	Both	None	None
FBti0062108	Burdock	LTR	FBgn0052017, FBgn0039925	0	None	None	None	Both
FBti0102121	HeT-A	LINE		1	None	None	None	Both
FBti0102119	HeT-A	LINE		0	None	None	None	Both
FBti0102118	TART-C	LINE		0	None	None	None	Both
FBti0102113	HeT-A	LINE		0	None	None	None	Both
FBti0102112	HeT-A	LINE		0	None	None	None	Both
FBti0102111	HeT-A	LINE		0	None	None	None	Both
FBti0062856	HeT-A	LINE		0	None	None	None	Both
FBti0063565	HeT-A	LINE		0	None	None	None	Both
FBti0062861	HeT-A	LINE	FBgn0058469	0	None	None	None	Both
FBti0062679	INE-1	DNA		0	None	None	Nonstress	Both
FBti0062682	INE-1	DNA	FBgn0025836	0	Both	Stress	Both	Both
FBti0062709	INE-1	DNA	FBgn0284435	0	Nonstress	Nonstress	Nonstress	Both
FBti0063309	INE-1	DNA	FBgn0011822, FBgn0052816	0	Stress	Both	Both	Both
FBti0063529	INE-1	DNA	FBgn0283741	0	Both	Both	Both	Both
FBti0019554	3S18	LTR	FBgn0266350, FBgn0029657	1	None	Both	None	Both
FBti0019578	springer	LTR	FBgn0029746, FBgn0266098	0	None	None	None	Stress
FBti0019603	H	DNA	FBgn0015519	1	None	None	None	Both
FBti0060033	INE-1	DNA		0	None	Stress	None	Both
FBti0019049	diver	LTR		0	None	None	None	Both
FBti0061088	INE-1	DNA	FBgn0020508	0	None	Both	Both	None
FBti0059782	297	LTR		1	None	Both	None	Both
FBti0019082	Rt1b	LINE	FBgn0030956	0	Both	Nonstress	Nonstress	Both
FBti0019091	S-element	DNA	FBgn0040089	0	None	None	Both	None
FBti0064093	INE-1	DNA		0	Both	Stress	None	None
FBti0064075	X-element	LINE		0	None	None	None	Both
FBti0064190	gypsy12	LTR		0	None	None	None	Both
FBti0148143	Y	LTR	FBgn0266457, FBgn0031182	0	None	None	None	Both
FBti0059697	mdg1	LTR		0	None	None	None	Both
FBti0059777	roo	LTR		0	None	None	None	Both
FBti0019687	G-element	LINE		0	None	None	None	Both
FBti0060088	G5A	LINE	FBgn0285970	0	None	None	None	Stress
FBti0060105	INE-1	DNA	FBgn0267704	0	Both	Stress	Both	Both
FBti0019700	Cr1a	LINE	FBgn0267704	0	None	None	None	Both
FBti0060199	mdg1	LTR	FBgn0267704	0	None	None	None	Both
FBti0060182	mdg1	LTR	FBgn0267704	0	None	None	None	Both
FBti0060672	R1A1-element	LINE		0	None	None	None	Both
FBti0060218	H	DNA		0	None	None	None	Both
FBti0060692	R1A1-element	LINE		0	None	None	None	Both
FBti0060579	G-element	LINE		1	None	None	None	Both
FBti0061329	1731	LTR		0	None	None	None	Nonstress
FBti0019739	invader5	LTR	FBgn0266348	0	Both	None	None	None
FBti0061749	1360	DNA	FBgn0266348	0	Stress	None	Nonstress	None
FBti0061720	G5A	LINE	FBgn0266348	0	None	None	None	Both
FBti0061721	BS3	LINE	FBgn0266348	0	None	None	None	Both
FBti0019743	X-element	LINE	FBgn0266348	0	None	None	None	Both

## Sheet: E) 30 TEs with peaks near DEGs
Table S5E. Additional information of the 30 TEs with ATAC-seq peaks near DEGs
1) TEs near DEGs, the X represents presence of a peak in the strain indicated by the column name. In bold, TEs that contain cnc binding sites
2) Tables of counts for Fisher's Exact Test for the 35 TEs with peaks nearby DEGs. Only families with more than 25 elements were considered. Families with a p-value<0.005 were considered significant and are indicated with ***.
1)									2)
TE Flybase ID	TE family	TE class	SE-Sto	RAL-375	RAL-177	iso-1	Evidence of selection (Rech et al., 2019)		TE Family	Counts in all 5416 TEs	Counts in 30 TEs with peaks	p-value		TE class	Counts in all 5416 TEs	Counts in 30 TEs with peaks	p-value
FBti0019334						X			1360 ***	303	7	0		DNA	3044	13	0.892
FBti0019430			X		X	X	yes		297	80	0	0.361		LINE	1054	8	0.112
FBti0019444				X	X				412	37	0	0.186		LTR	1318	9	0.173
FBti0020068						X			baggins	34	0	0.173
FBti0020438			X	X	X	X			blood	25	0	0.13
FBti0060028				X	X	X			BS	43	0	0.213
FBti0060056						X			BS3	29	0	0.149
FBti0060105			X	X	X	X			copia	35	0	0.177
FBti0060155			X	X	X	X			Cr1a	152	2	0.05
FBti0060235			X	X	X	X			diver2	47	1	0.027
FBti0060299				X	X	X			Dm88	31	0	0.159
FBti0060358						X			Doc	68	1	0.054
FBti0060443				X	X	X	yes		FB	60	0	0.285
FBti0060913			X		X	X			F-element	70	0	0.324
FBti0061018			X	X	X	X			flea	29	0	0.149
FBti0061088				X	X				G4	28	0	0.144
FBti0061396			X	X	X	X			G5	25	1	0.008
FBti0062187			X		X				G5A	27	0	0.14
FBti0062309			X		X	X			gypsy12	50	0	0.244
FBti0062779			X	X	X	X			gypsy8	56	1	0.038
FBti0062861						X			H	59	0	0.281
FBti0062912					X	X			HB	60	0	0.285
FBti0062914			X	X	X	X			HeT-A ***	26	2	0
FBti0063060					X				I-element	38	0	0.191
FBti0063239			X	X	X	X			INE-1	2234	6	0.992
FBti0063265			X	X	X				invader1	45	1	0.025
FBti0063301			X	X	X	X			invader3	33	0	0.168
FBti0063309			X	X	X	X			invader4	32	0	0.163
FBti0063689			X	X	X	X			jockey	96	1	0.098
FBti0063778			X		X	X			jockey2	28	0	0.144
									mdg1	40	1	0.02
									opus	31	0	0.159
									pogo	48	0	0.235
									Quasimodo	29	0	0.149
									R1A1-element	26	0	0.135
									roo	136	0	0.536
									Rt1a	25	1	0.008
									Rt1b	58	0	0.277
									Rt1c	33	0	0.168
									S-element	65	0	0.305
									Stalker4	37	0	0.186
									Tc1	26	0	0.135
									Tirant	25	0	0.13
									X-element	55	0	0.265

## Sheet: F) 11 Putative Long Distance En
Table S5F. TEs more than 1kb away from genes with ATAC-seq peaks. The evidence of selection for each TE and the number of cnc binding sites on each peak is included.
Candidate TEs	Evidence of selection (Rech 2019)	Cnc binding sites
FBti0019149	young & long	0
FBti0019225	NA	1
FBti0019355	young & long	0
FBti0059701	NA	1
FBti0059711	NA	1
FBti0059727	NA	1
FBti0059782	NA	1
FBti0060252	NA	1
FBti0060579	NA	1
FBti0062236	NA	1
FBti0102121	NA	1
